# Supplementary material for: S100A16 suppresses the proliferation, migration and invasion of colorectal cancer cells in part via the JNK/p38 MAPK pathway
Source: PubMed Central journal article supplement — Mol Med Rep. 2020 Dec 22;23(2):164. doi: 10.3892/mmr.2020.11803 (PMC7789101; doi:10.3892/mmr.2020.11803), 2020-12-22

Figure S1. S100A16 knockdown is specific to S100A16. (A) RT-qPCR and (B) western blot analyses of S100A16, S100A4 and S100A14 expression levels in HCT116 and SW480 cells transfected with S100A16 siRNAs, compared with the si-Ctrl group. (C) RT-qPCR detection of Lenti-S100A16 overexpression efficacy in Lovo cells, compared with the Lenti-vector group. \*\* $P < 0.01$  and \* $P < 0.05$ . RT-qPCR, reverse transcription-quantitative PCR; siRNA/si, small interfering RNA; Ctrl, control; S100A16, S100 calcium binding protein A16.

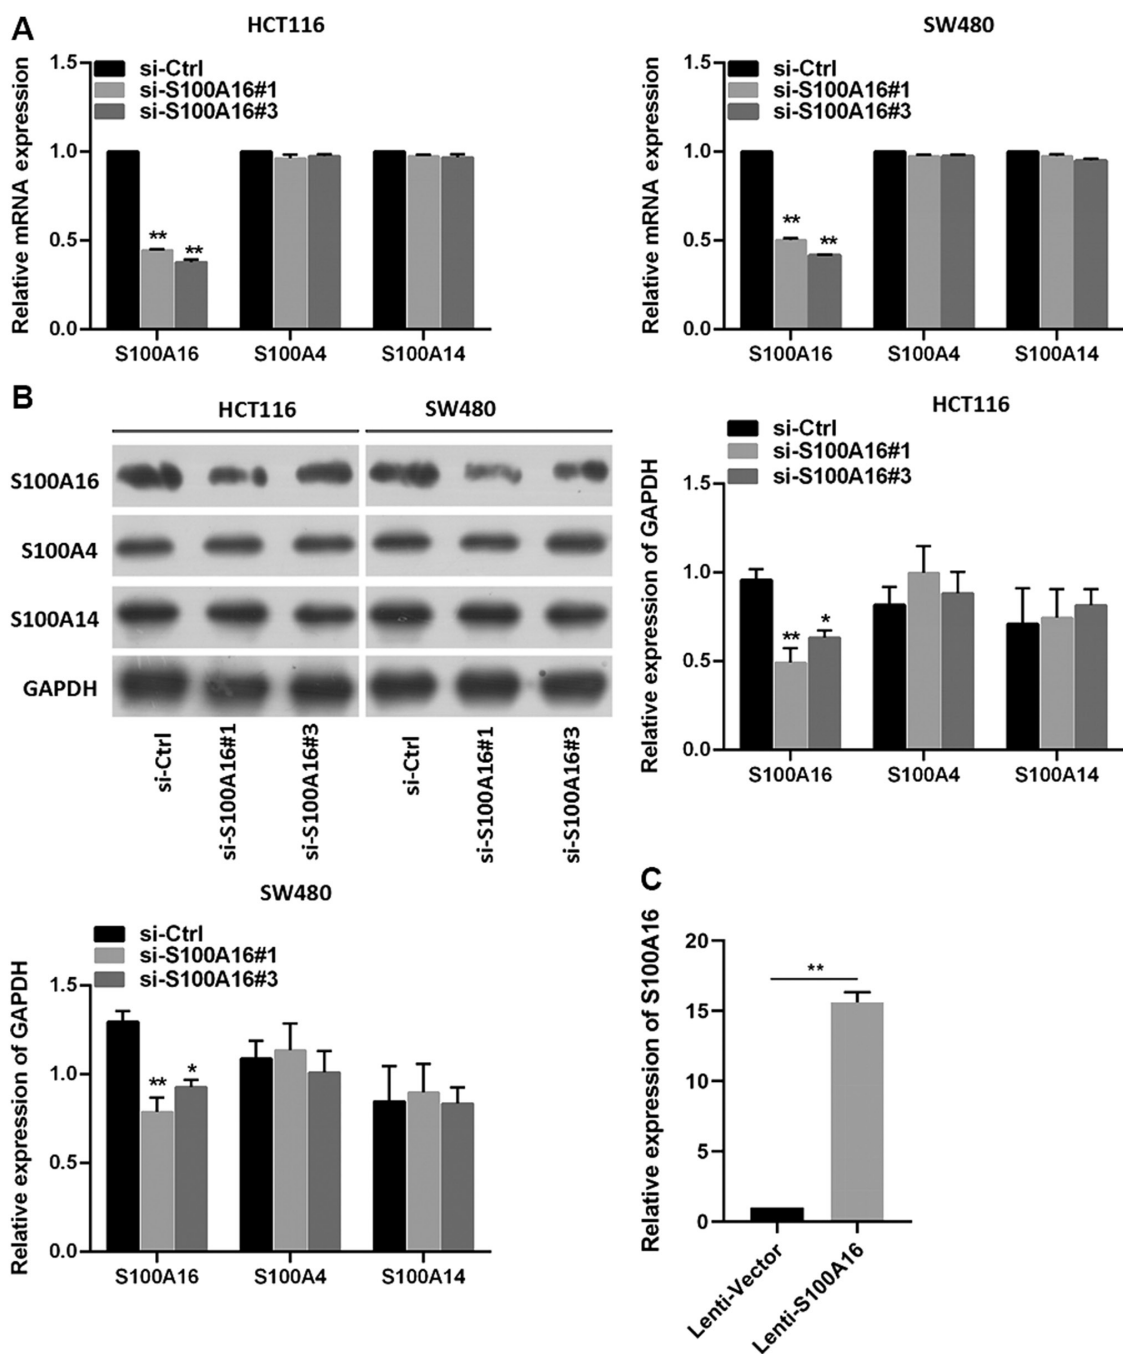

Supplement: Supplementary_Data.pdf [file Supplementary_Data.pdf]
